# Supplementary material for: Body mass index and the risk of basal cell carcinoma: evidence from Mendelian randomization analysis
Source: PeerJ journal article supplement (doi:10.7717/peerj.14781), 2023-01-24

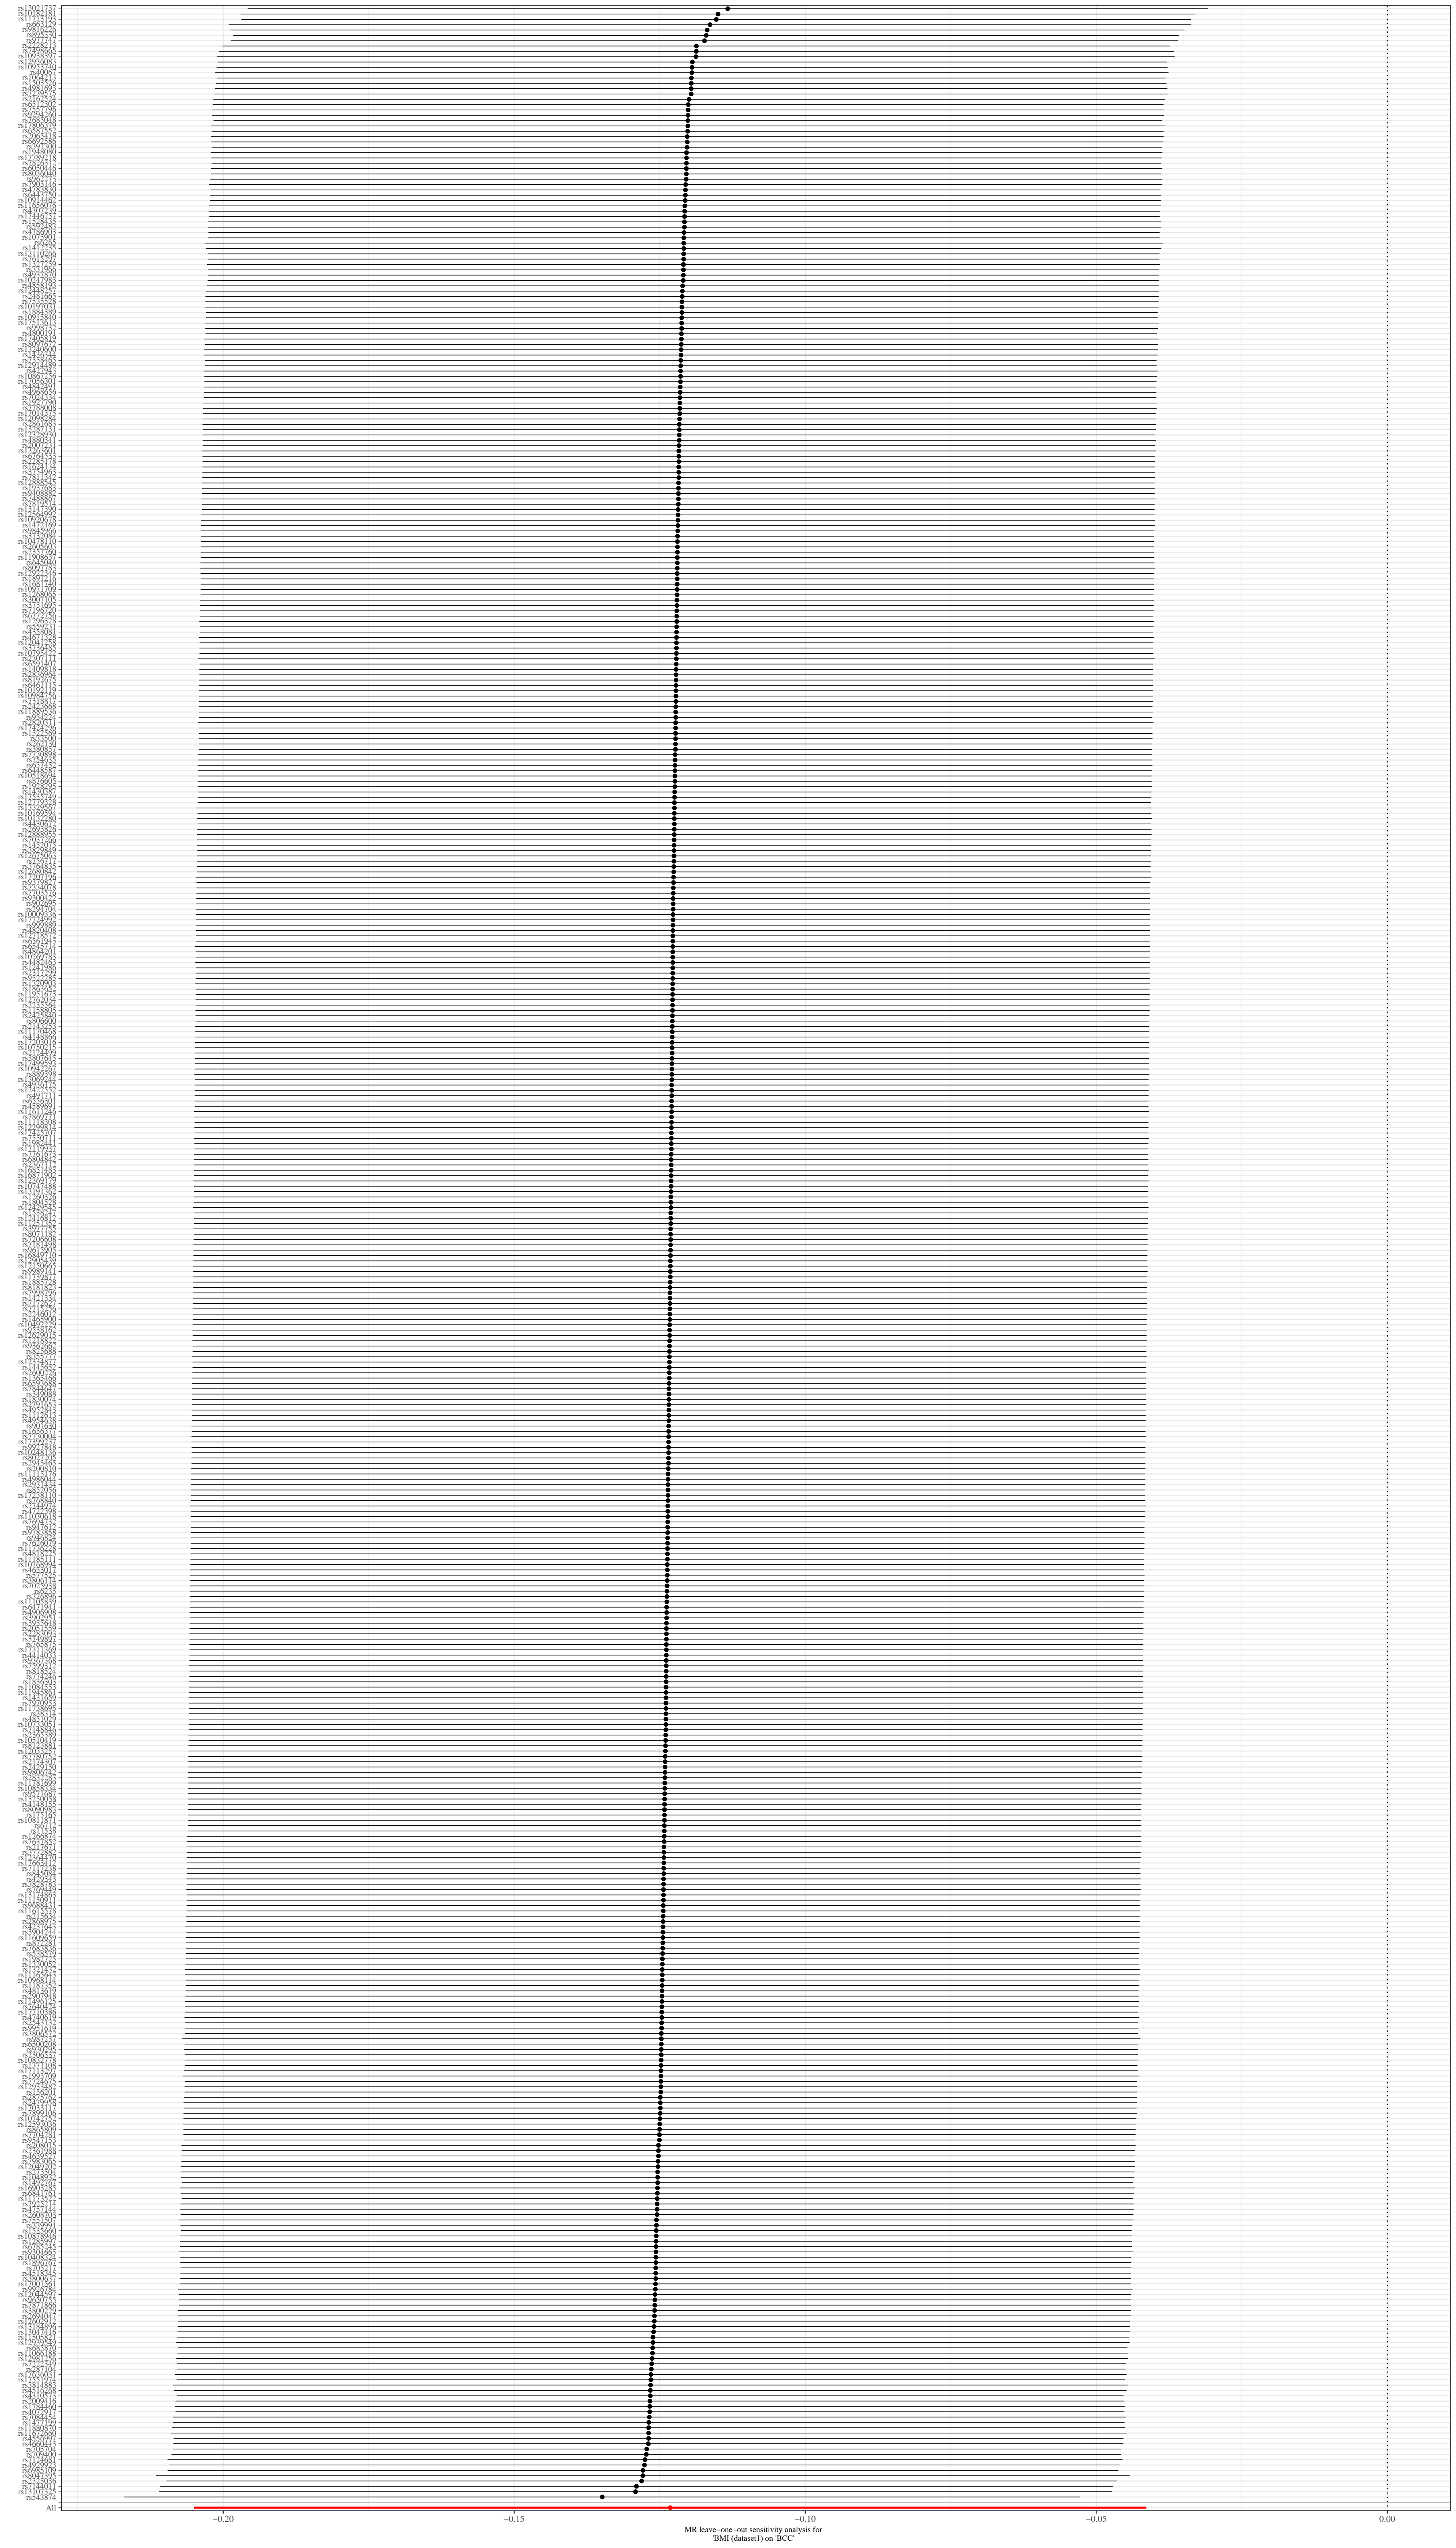

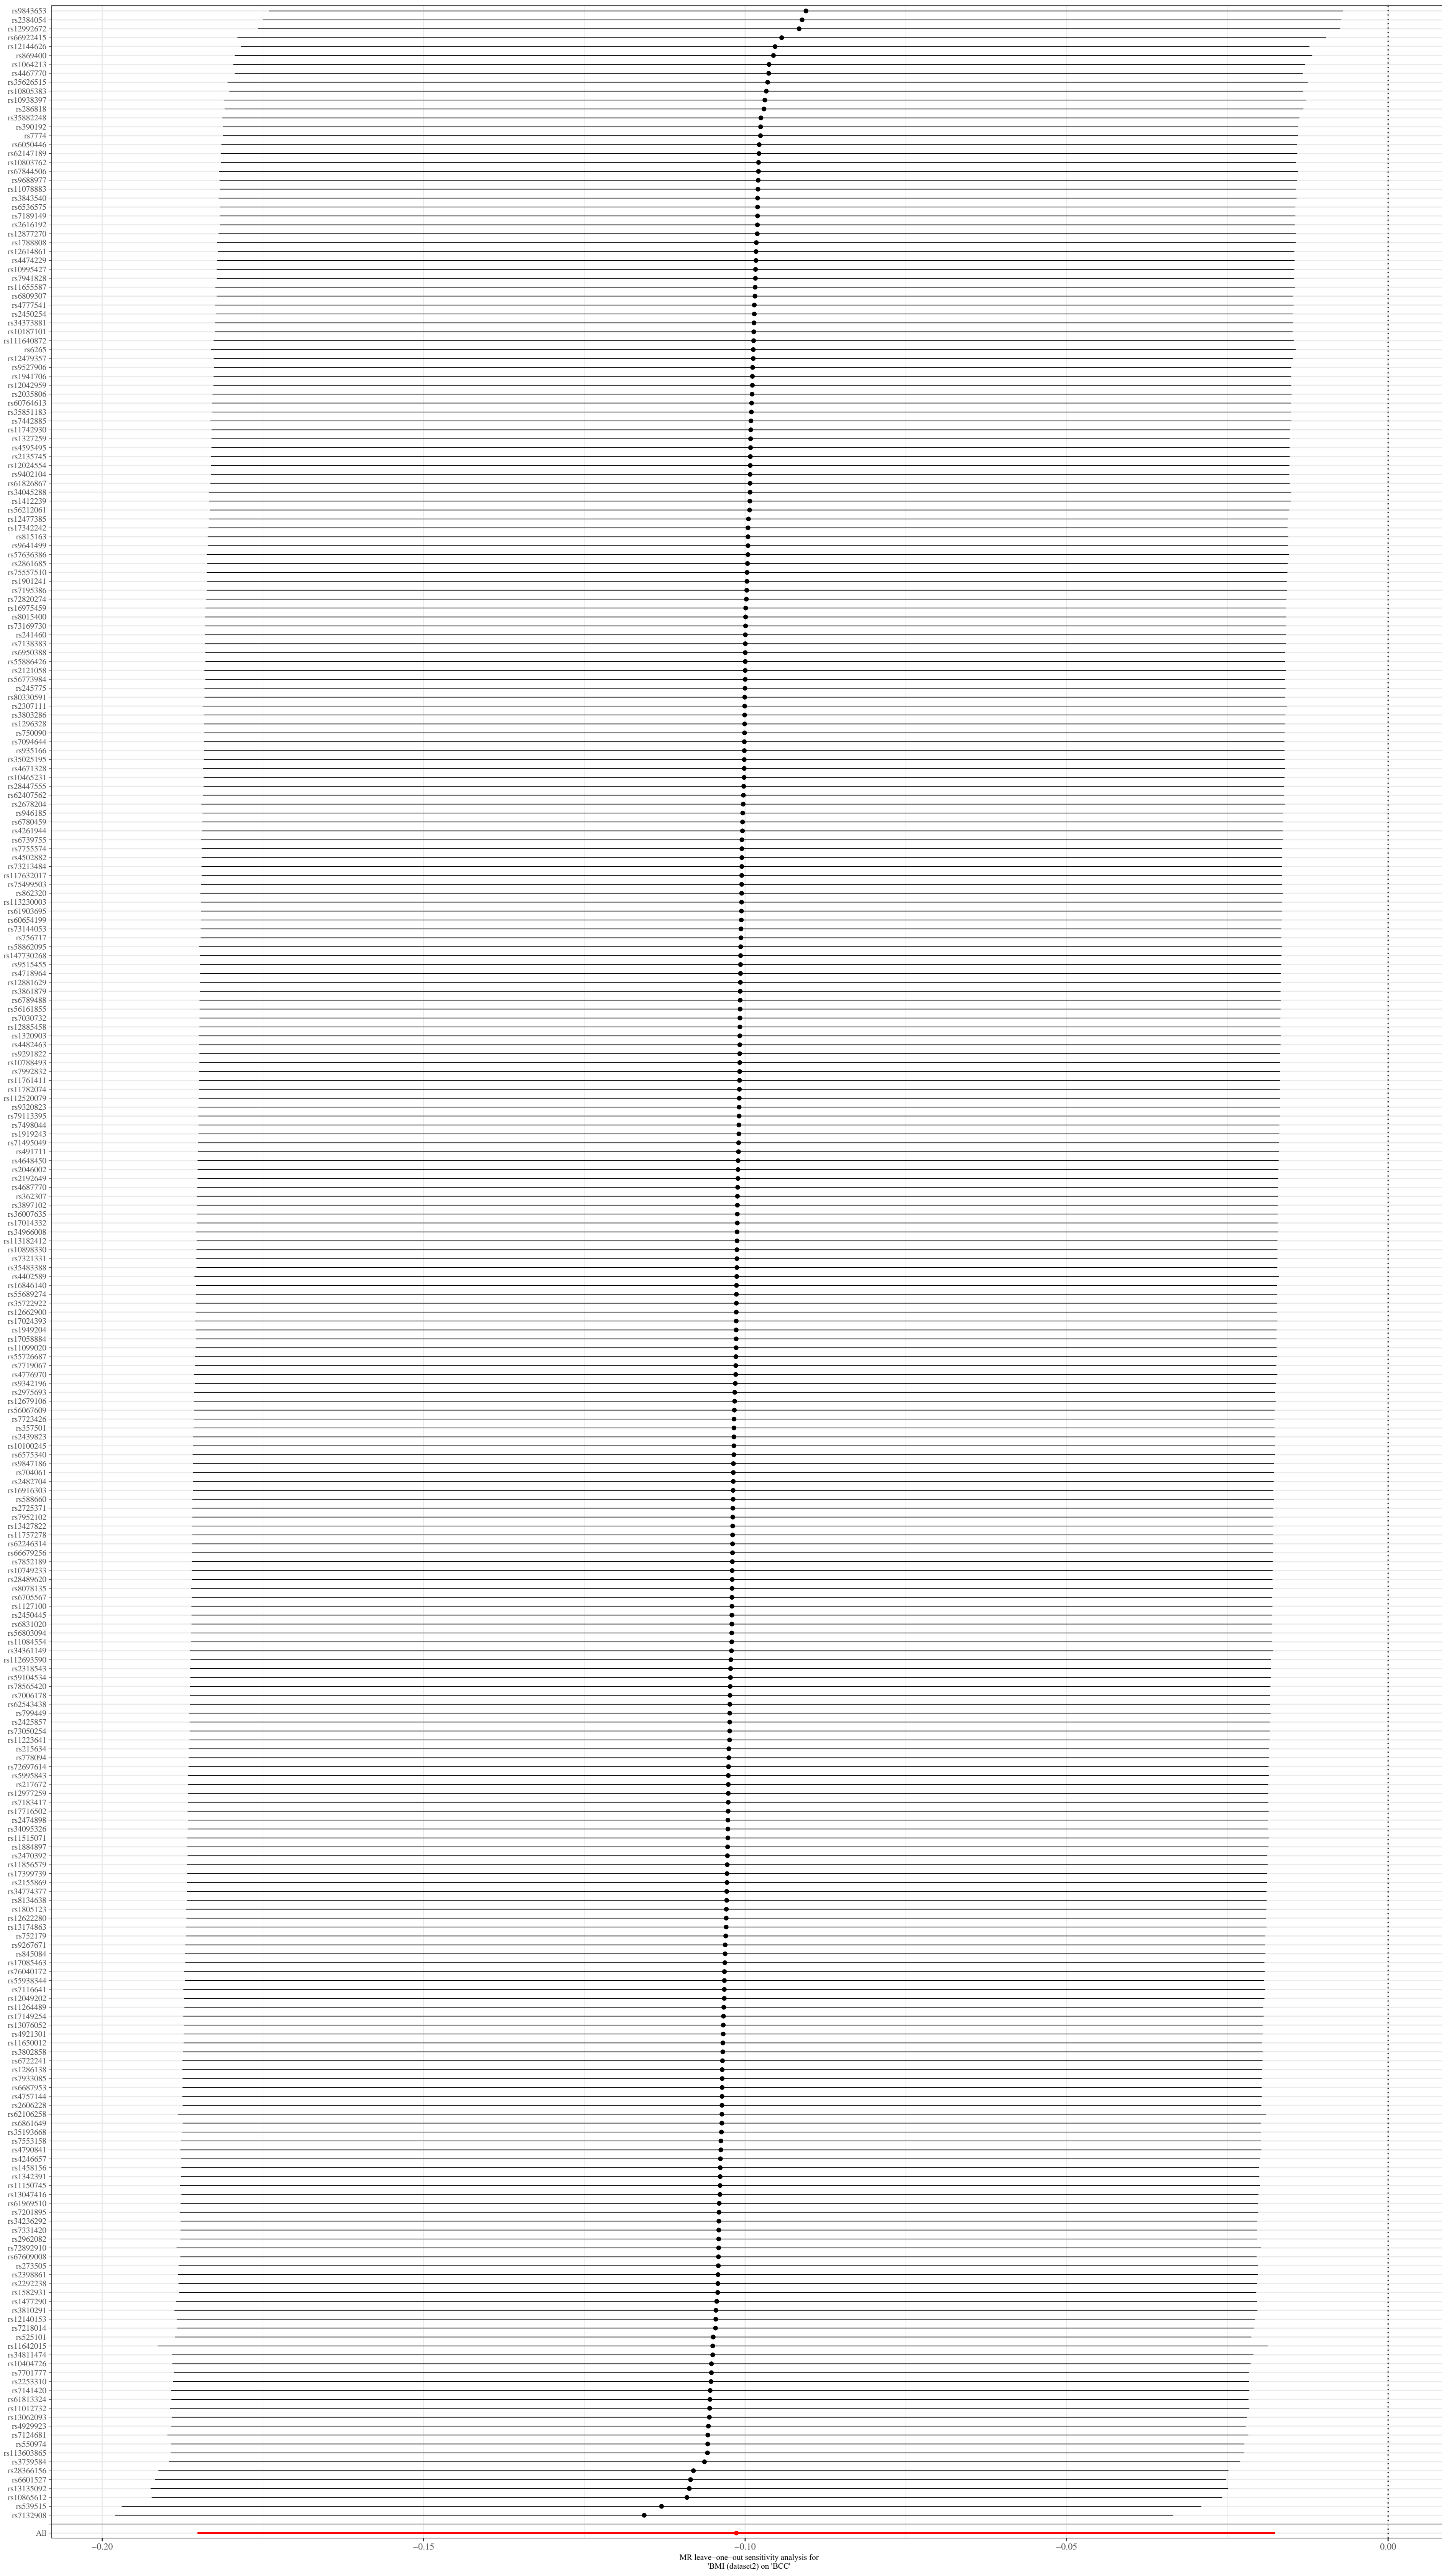

rs9843653  
rs2384054  
rs12992672  
rs6692415  
rs12144626  
rs869400  
rs1064213  
rs4467701  
rs35626515  
rs10805383  
rs10923897  
rs286818  
rs35882248  
rs390192  
rs774  
rs6050446  
rs62147189  
rs10803762  
rs67844506  
rs968977  
rs11078883  
rs3843540  
rs6536575  
rs7189149  
rs2616192  
rs12872270  
rs1788808  
rs12614861  
rs4474229  
rs10995427  
rs7941828  
rs11655587  
rs6809307  
rs477541  
rs2490254  
rs24573881  
rs10187101  
rs11640872  
rs6265  
rs12479357  
rs9527906  
rs1941706  
rs12042959  
rs2035806  
rs60764613  
rs35851183  
rs7442885  
rs11742930  
rs1327259  
rs4595495  
rs2135745  
rs12024554  
rs9402104  
rs61826867  
rs3405288  
rs1415239  
rs6212061  
rs12477385  
rs17342242  
rs75163  
rs9641499  
rs7636386  
rs2861685  
rs75557510  
rs1901241  
rs7195386  
rs7282024  
rs16975459  
rs8015400  
rs73169720  
rs241460  
rs7138383  
rs9950388  
rs5586426  
rs2121058  
rs5673984  
rs24575  
rs80330591  
rs2307111  
rs3803286  
rs1296228  
rs750090  
rs7094644  
rs935166  
rs35025195  
rs4671328  
rs10465231  
rs28447555  
rs62407562  
rs2678204  
rs946185  
rs6780459  
rs4261944  
rs6739755  
rs755574  
rs4502882  
rs73213484  
rs117632017  
rs75499503  
rs862320  
rs113209003  
rs61803695  
rs60654199  
rs73144053  
rs756717  
rs58862095  
rs147730268  
rs9515455  
rs4718964  
rs12881629  
rs3861879  
rs6780488  
rs56161855  
rs7030732  
rs12885458  
rs1230915  
rs4482463  
rs9291822  
rs10788493  
rs7992832  
rs11761411  
rs11782074  
rs112520479  
rs9320823  
rs79113395  
rs7498044  
rs1919243  
rs71495049  
rs491711  
rs4648450  
rs2046002  
rs2192649  
rs4687770  
rs362307  
rs3897102  
rs36007635  
rs17014332  
rs34966008  
rs113182412  
rs10898330  
rs7321331  
rs35483388  
rs4402589  
rs16846140  
rs55689274  
rs35729222  
rs12662908  
rs17024393  
rs1949204  
rs17058884  
rs11099020  
rs55726687  
rs7719667  
rs4776970  
rs9342196  
rs2975693  
rs12679106  
rs56867609  
rs7723426  
rs357501  
rs2439823  
rs10100245  
rs6575340  
rs9847186  
rs704061  
rs2482704  
rs16916303  
rs5886601  
rs2725371  
rs7952102  
rs13427822  
rs11752728  
rs62246314  
rs66679256  
rs7852189  
rs10749233  
rs28489620  
rs8878125  
rs6705567  
rs1127100  
rs2450445  
rs6831020  
rs56803094  
rs11084554  
rs34361149  
rs112693590  
rs2318543  
rs59104534  
rs78565420  
rs7006178  
rs62543438  
rs799449  
rs2425857  
rs73050254  
rs11223641  
rs215634  
rs778094  
rs72697614  
rs5959543  
rs217672  
rs12977259  
rs7183417  
rs1716802  
rs2474898  
rs34095326  
rs11518971  
rs1884897  
rs2470392  
rs11856579  
rs17399739  
rs2155869  
rs34774377  
rs1134638  
rs1805123  
rs12622280  
rs13174863  
rs52179  
rs9267671  
rs845084  
rs17085463  
rs76040172  
rs5938344  
rs7116641  
rs12049202  
rs11264489  
rs17149254  
rs13076052  
rs4921301  
rs11650012  
rs3802838  
rs6722241  
rs1286138  
rs7933985  
rs6687953  
rs4757144  
rs2606228  
rs62106258  
rs6861649  
rs35193668  
rs7553158  
rs4790841  
rs4246657  
rs1458156  
rs1342391  
rs11150745  
rs13047416  
rs61969510  
rs7201895  
rs34236292  
rs7331420  
rs2962082  
rs2892910  
rs67609008  
rs273505  
rs239864  
rs2292238  
rs1582931  
rs1477290  
rs3810291  
rs12140153  
rs7218014  
rs252101  
rs11642015  
rs34811474  
rs3304726  
rs7701777  
rs2253310  
rs7141420  
rs6181324  
rs11012732  
rs13062993  
rs4929923  
rs7124681  
rs550974  
rs113603865  
rs799584  
rs28366156  
rs6601527  
rs13135992  
rs10865612  
rs539515  
rs7132908

All

-0.20 -0.15 -0.10 -0.05 0.00



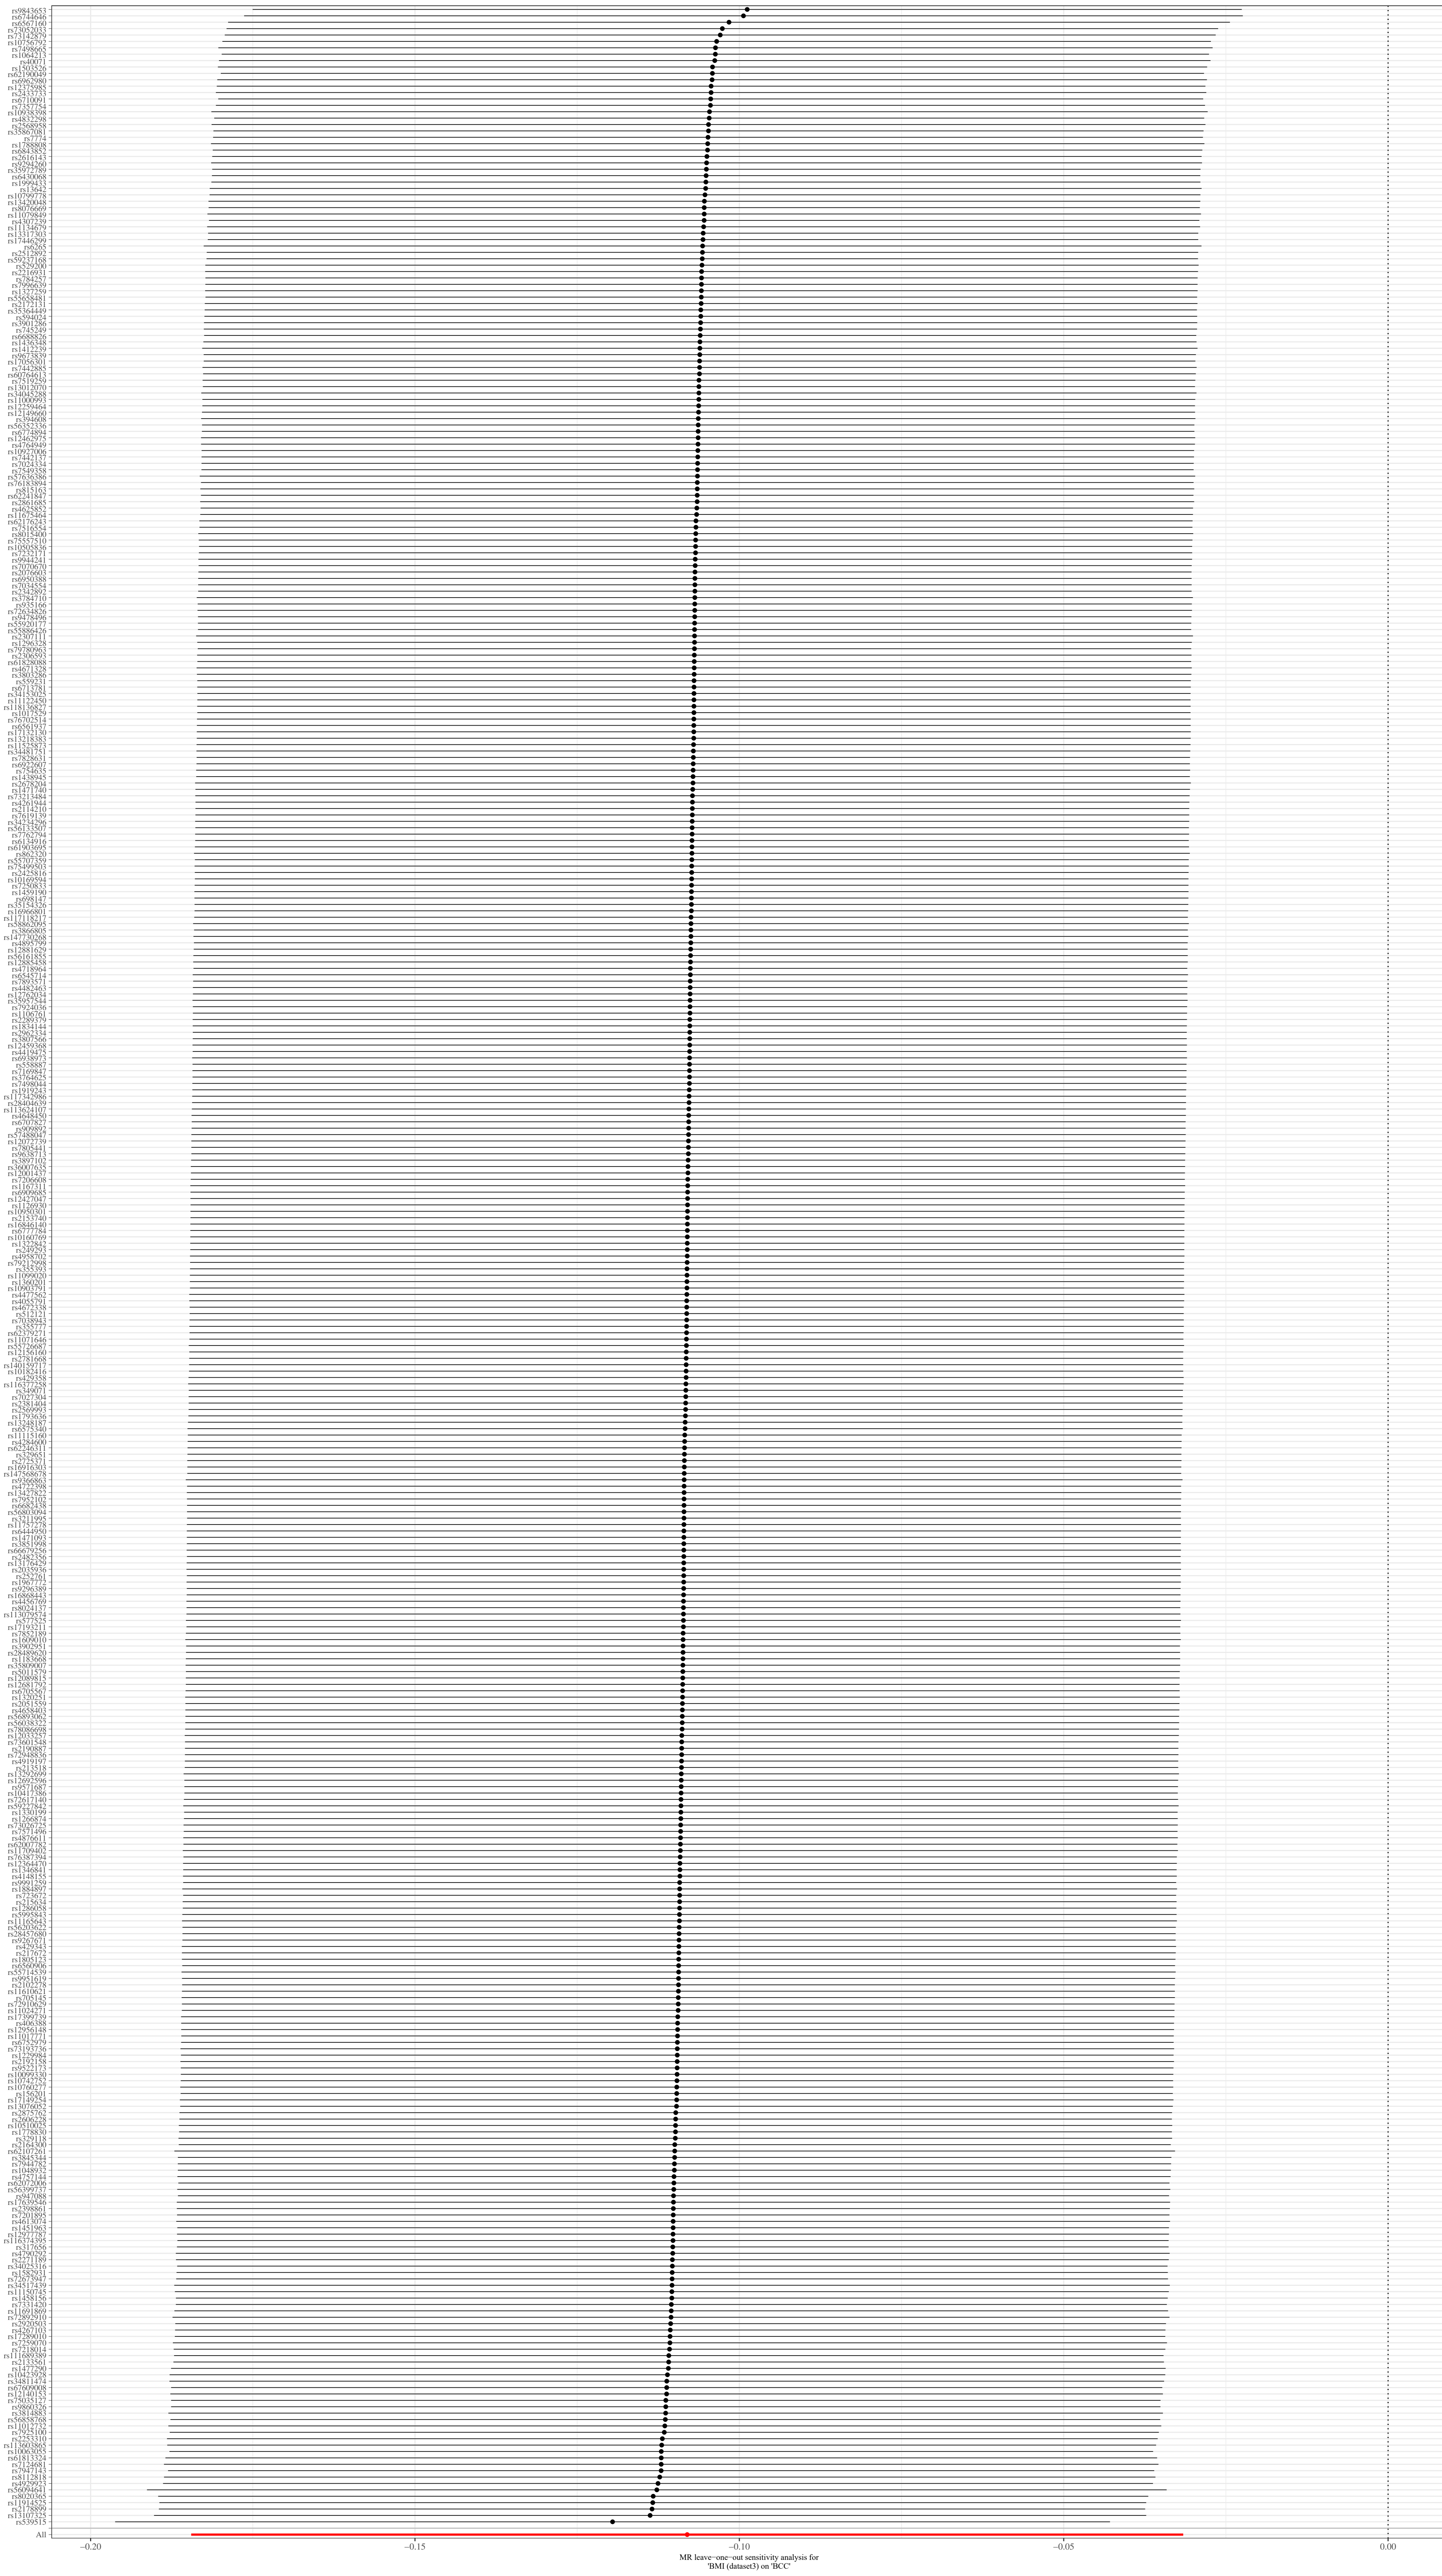

All

-0.20 -0.15 -0.10 -0.05 0.00

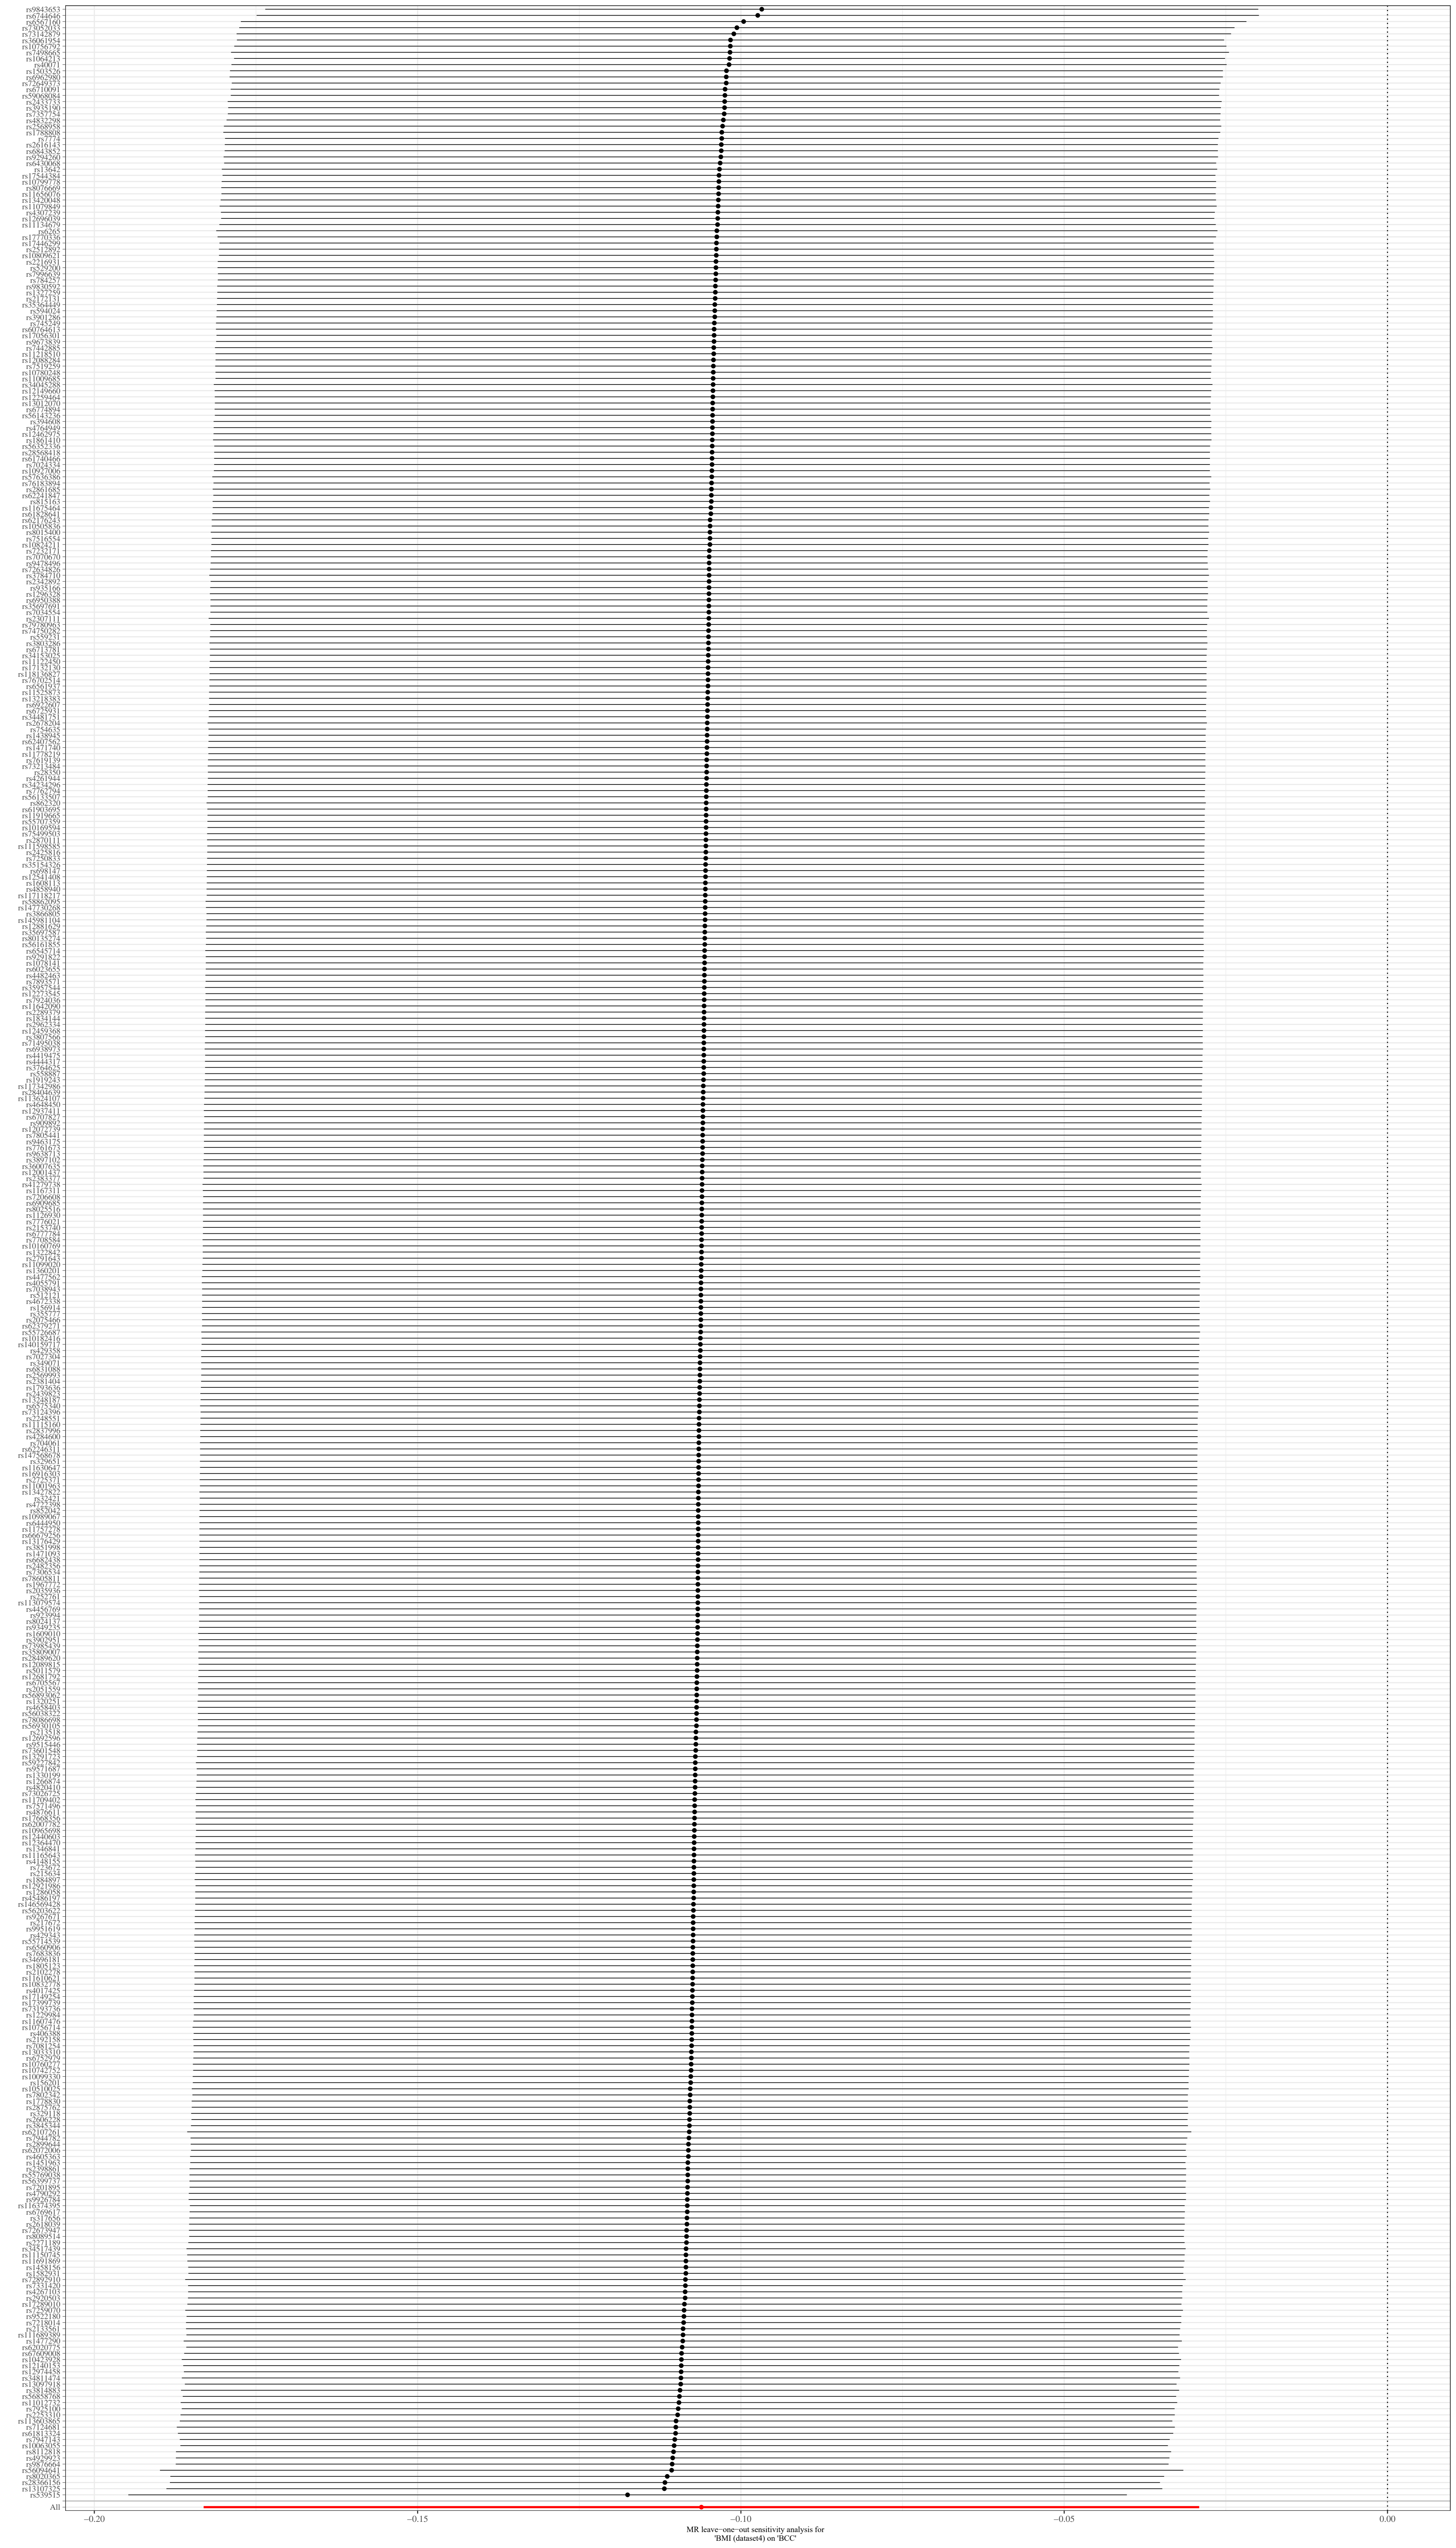

Supplement: Figure_S2.pdf [file Figure_S2.pdf]
