# Supplementary material for: Body mass index and the risk of basal cell carcinoma: evidence from Mendelian randomization analysis
Source: PeerJ journal article supplement (doi:10.7717/peerj.14781), 2023-01-24

A

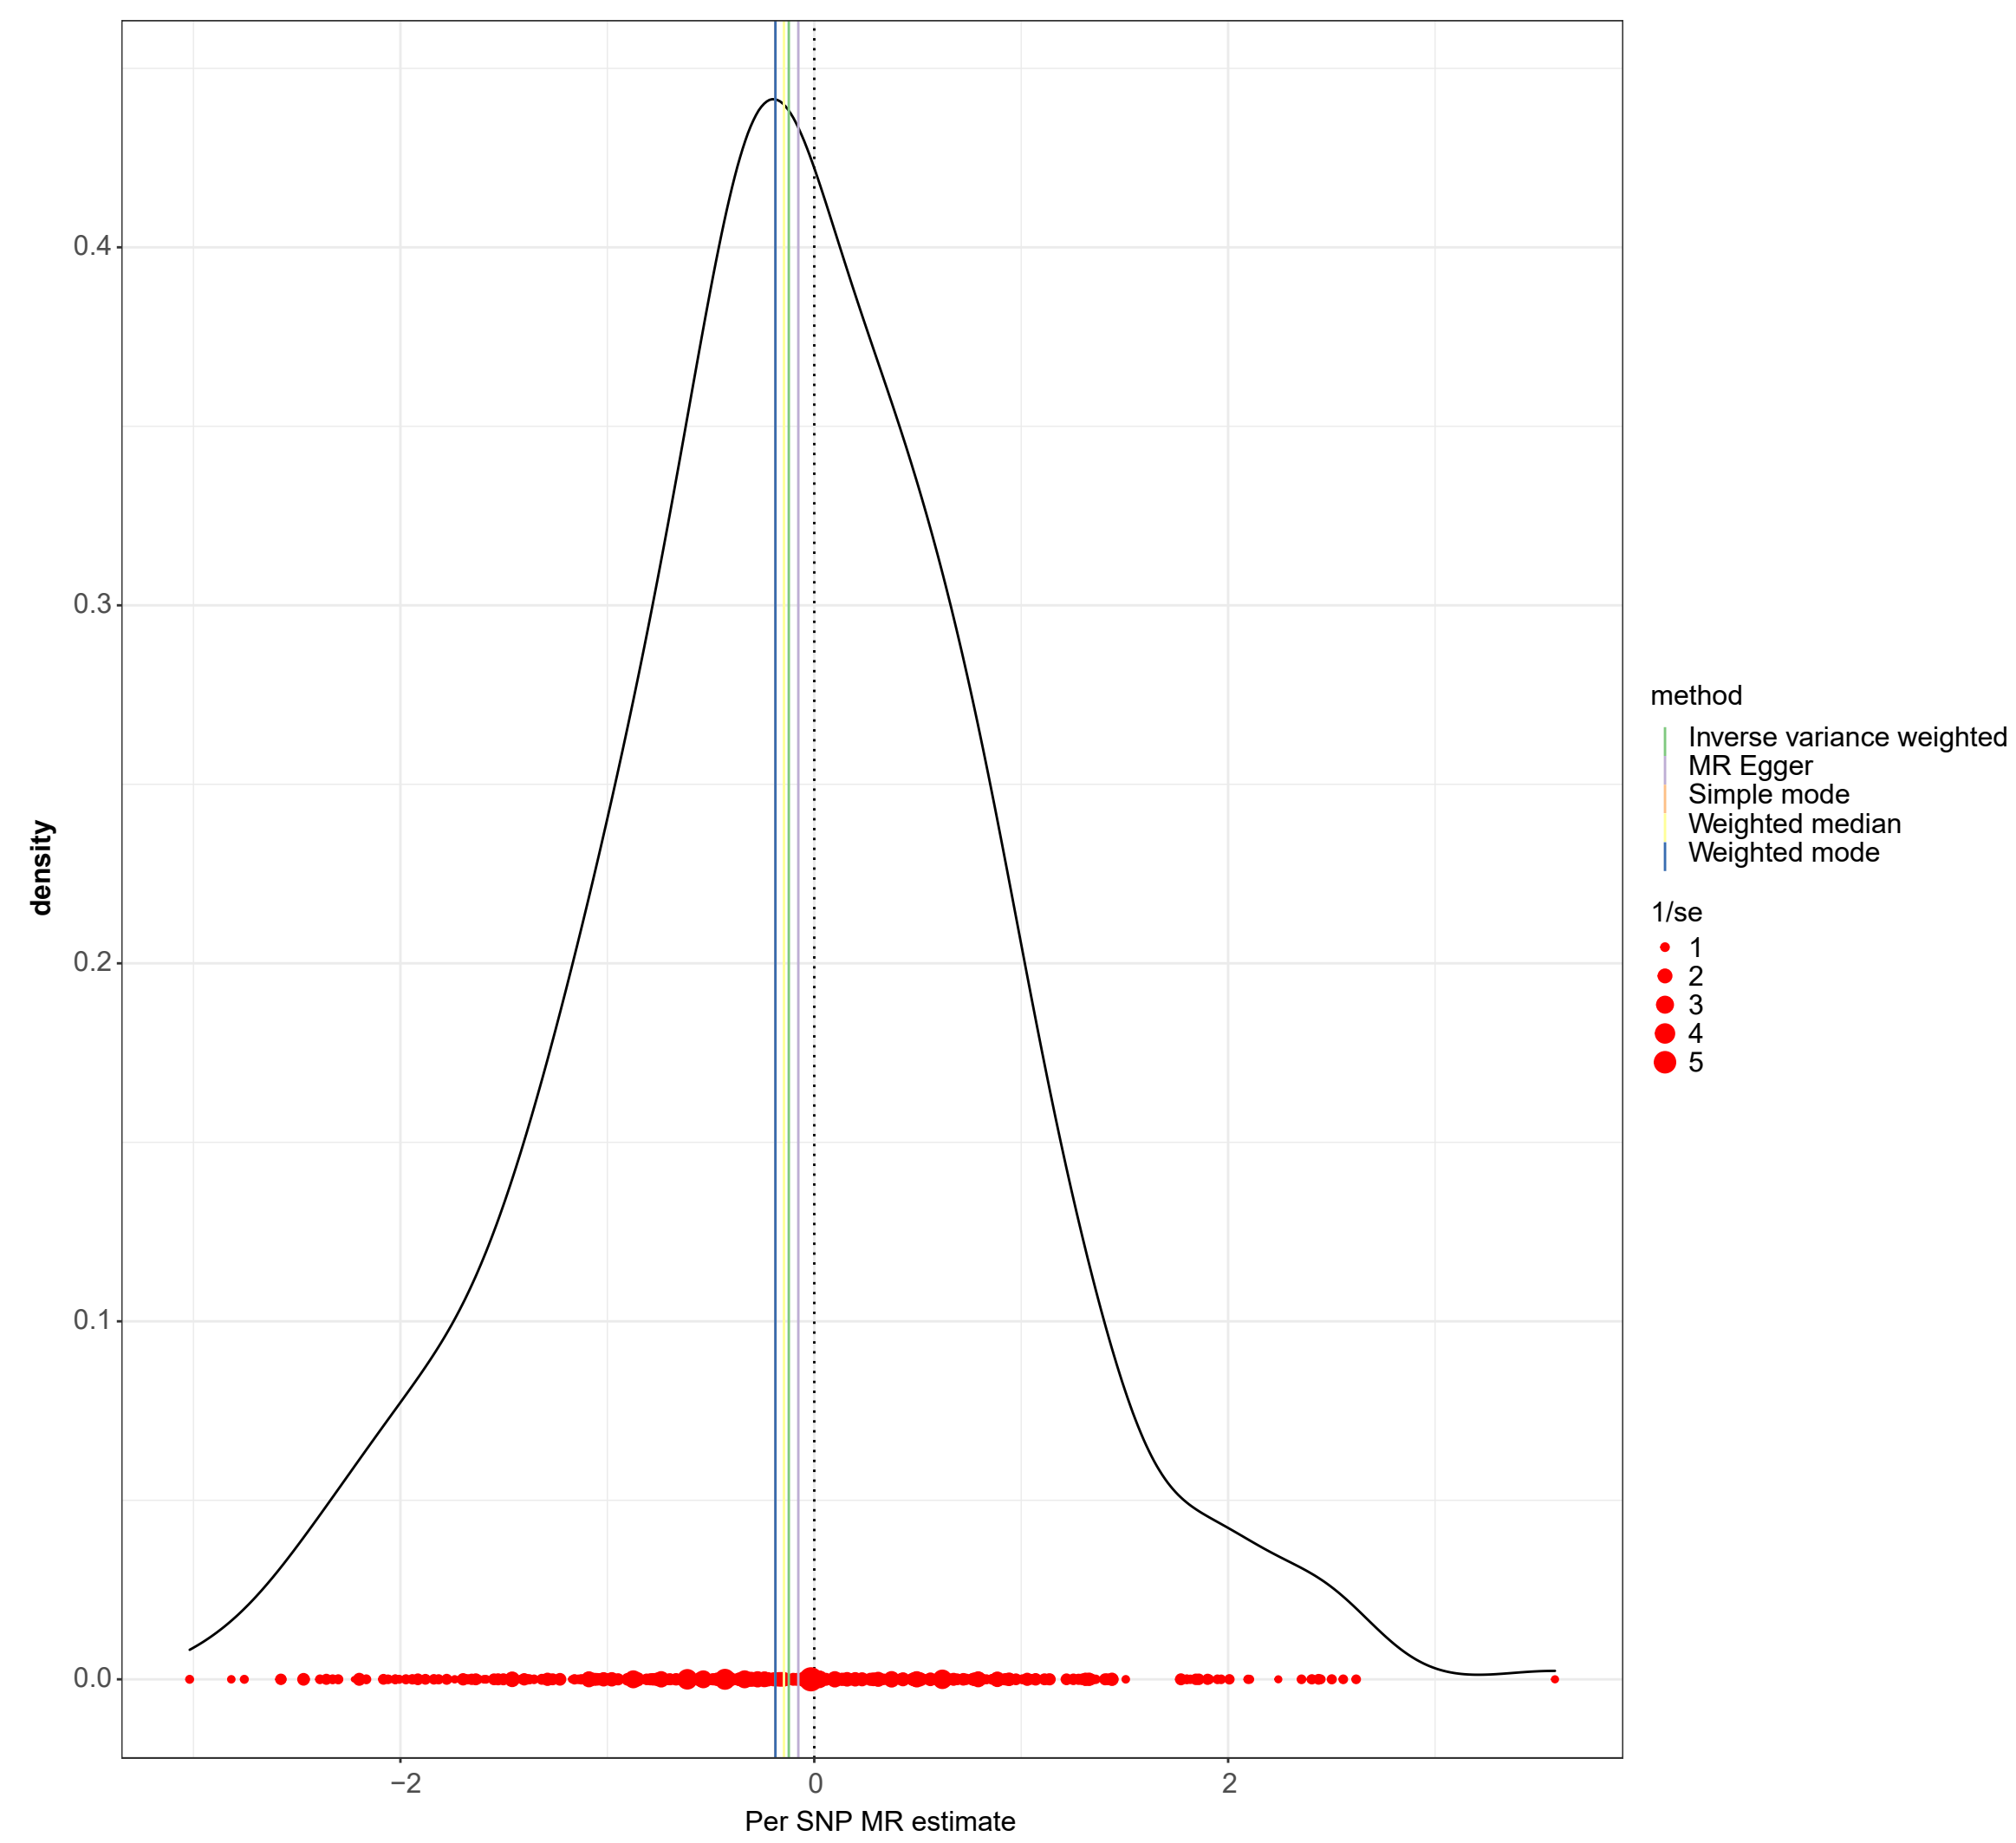

B

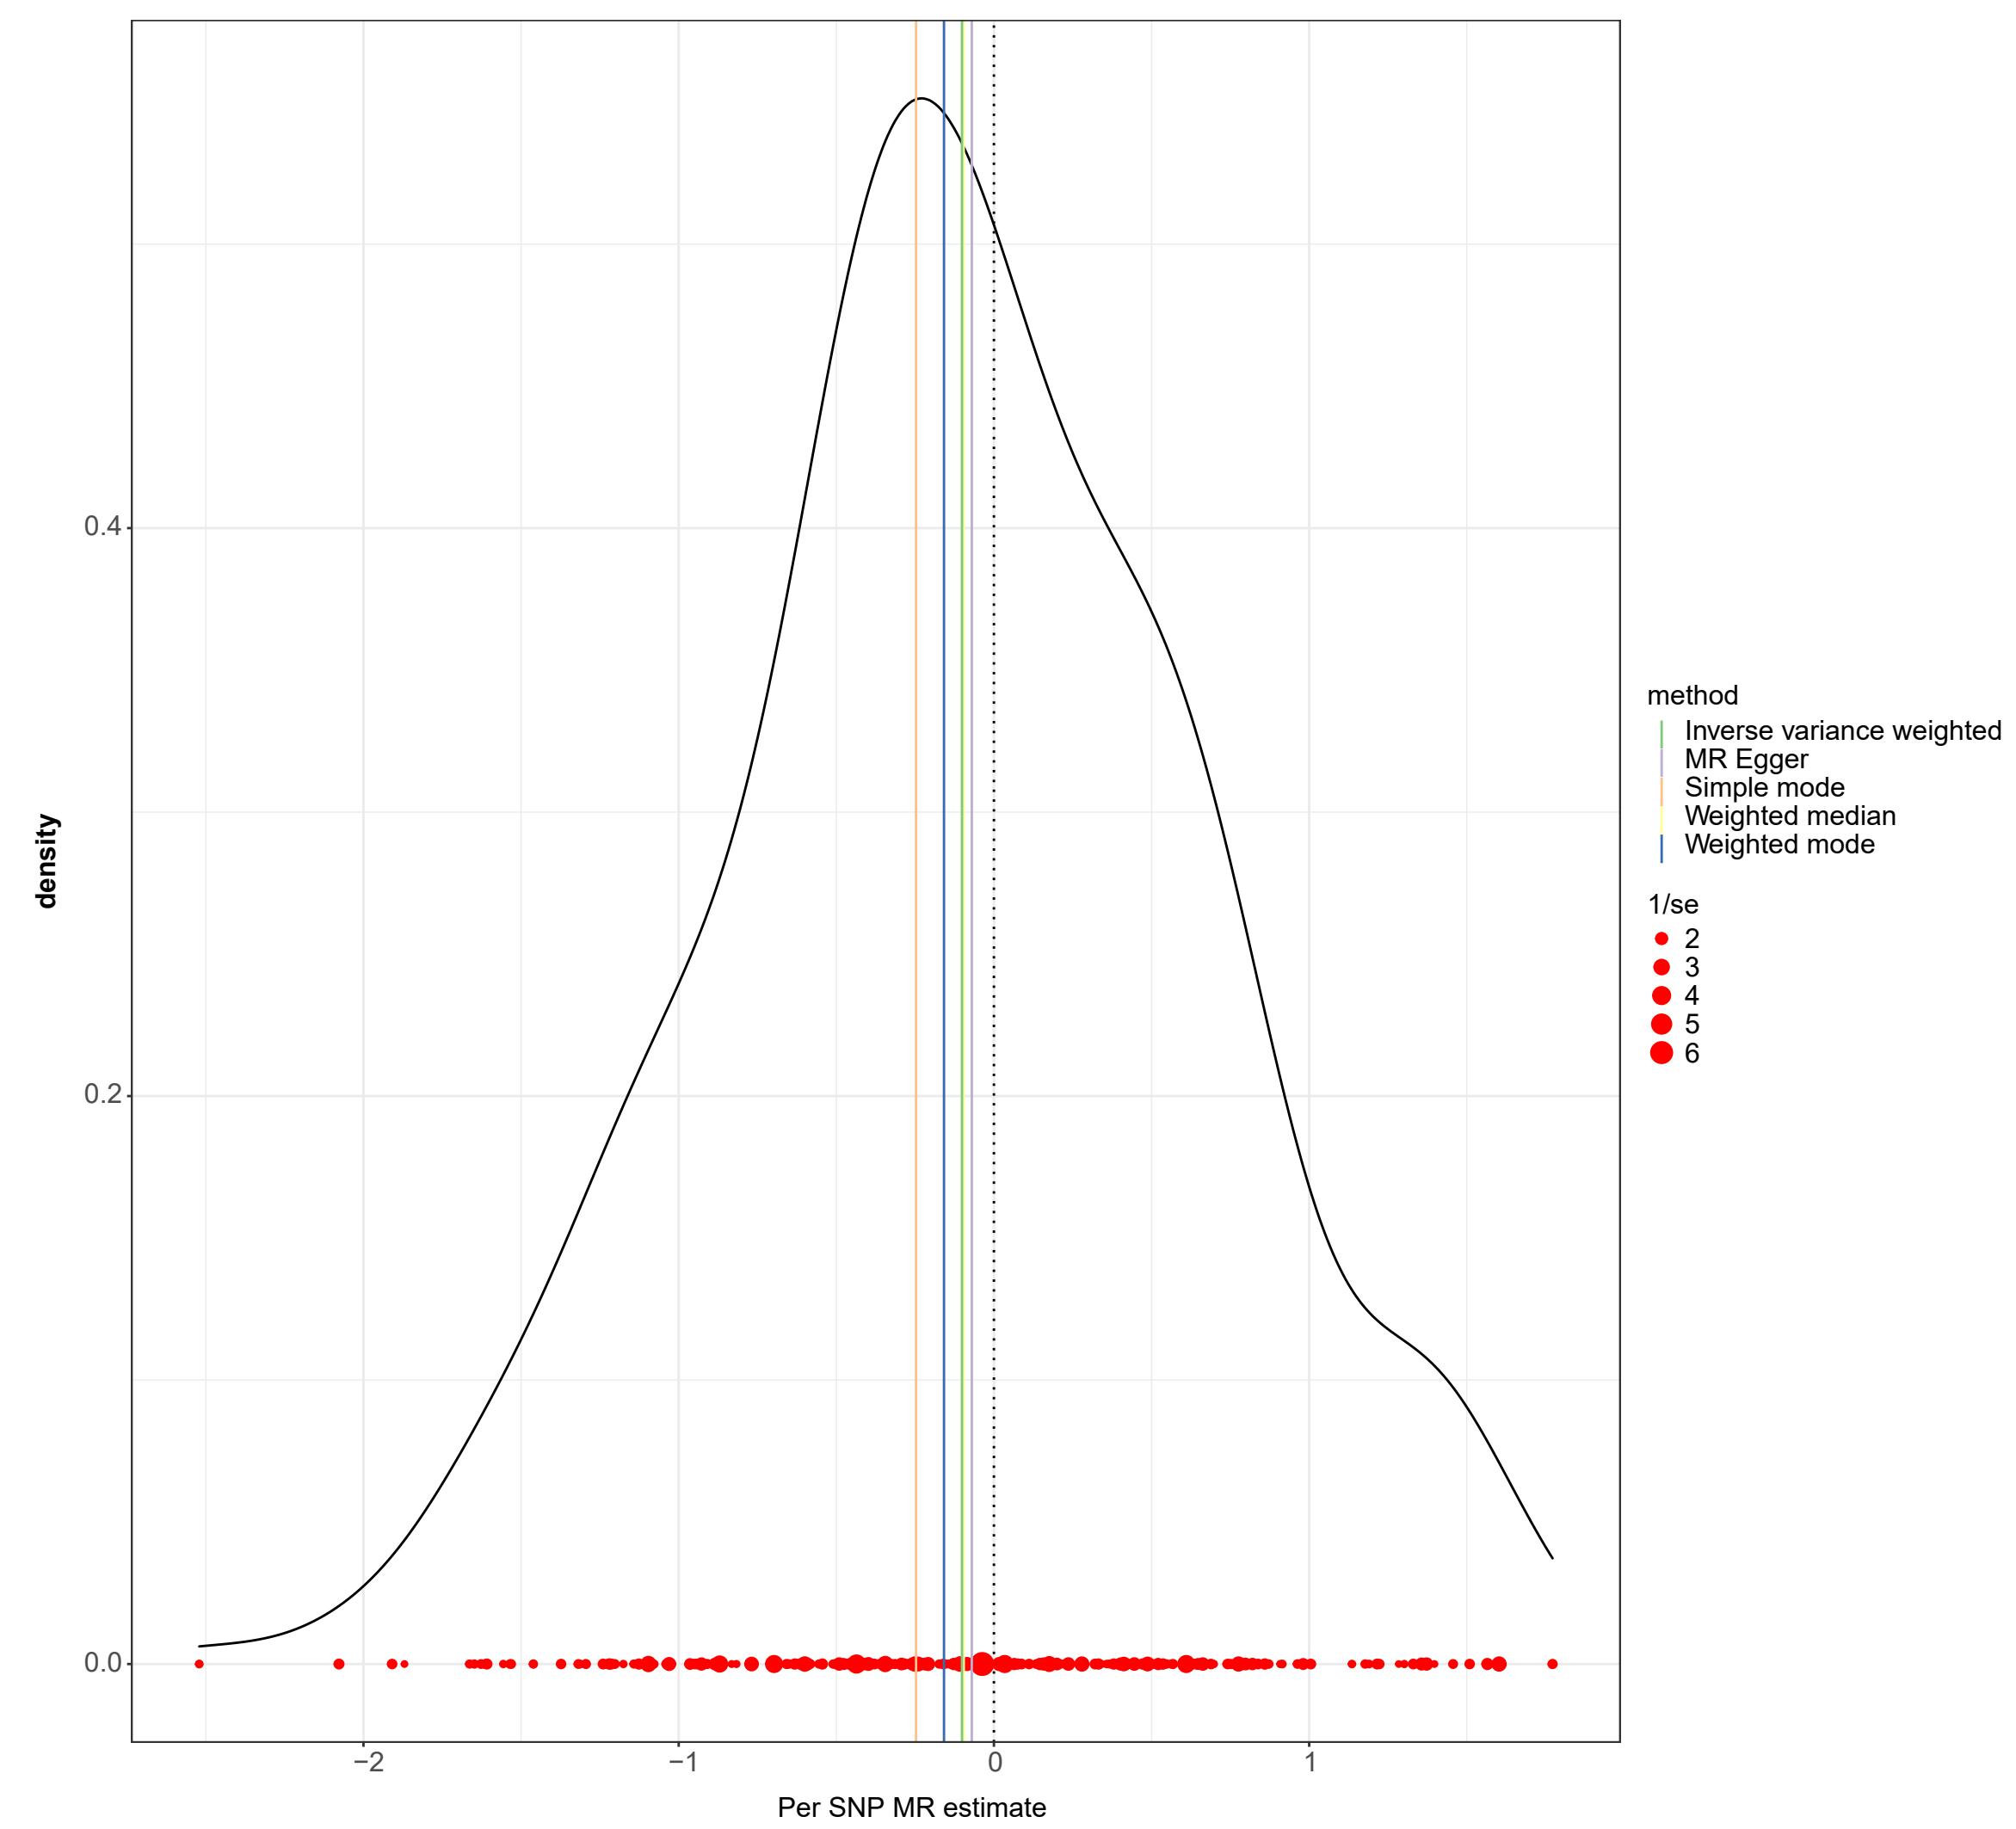

C

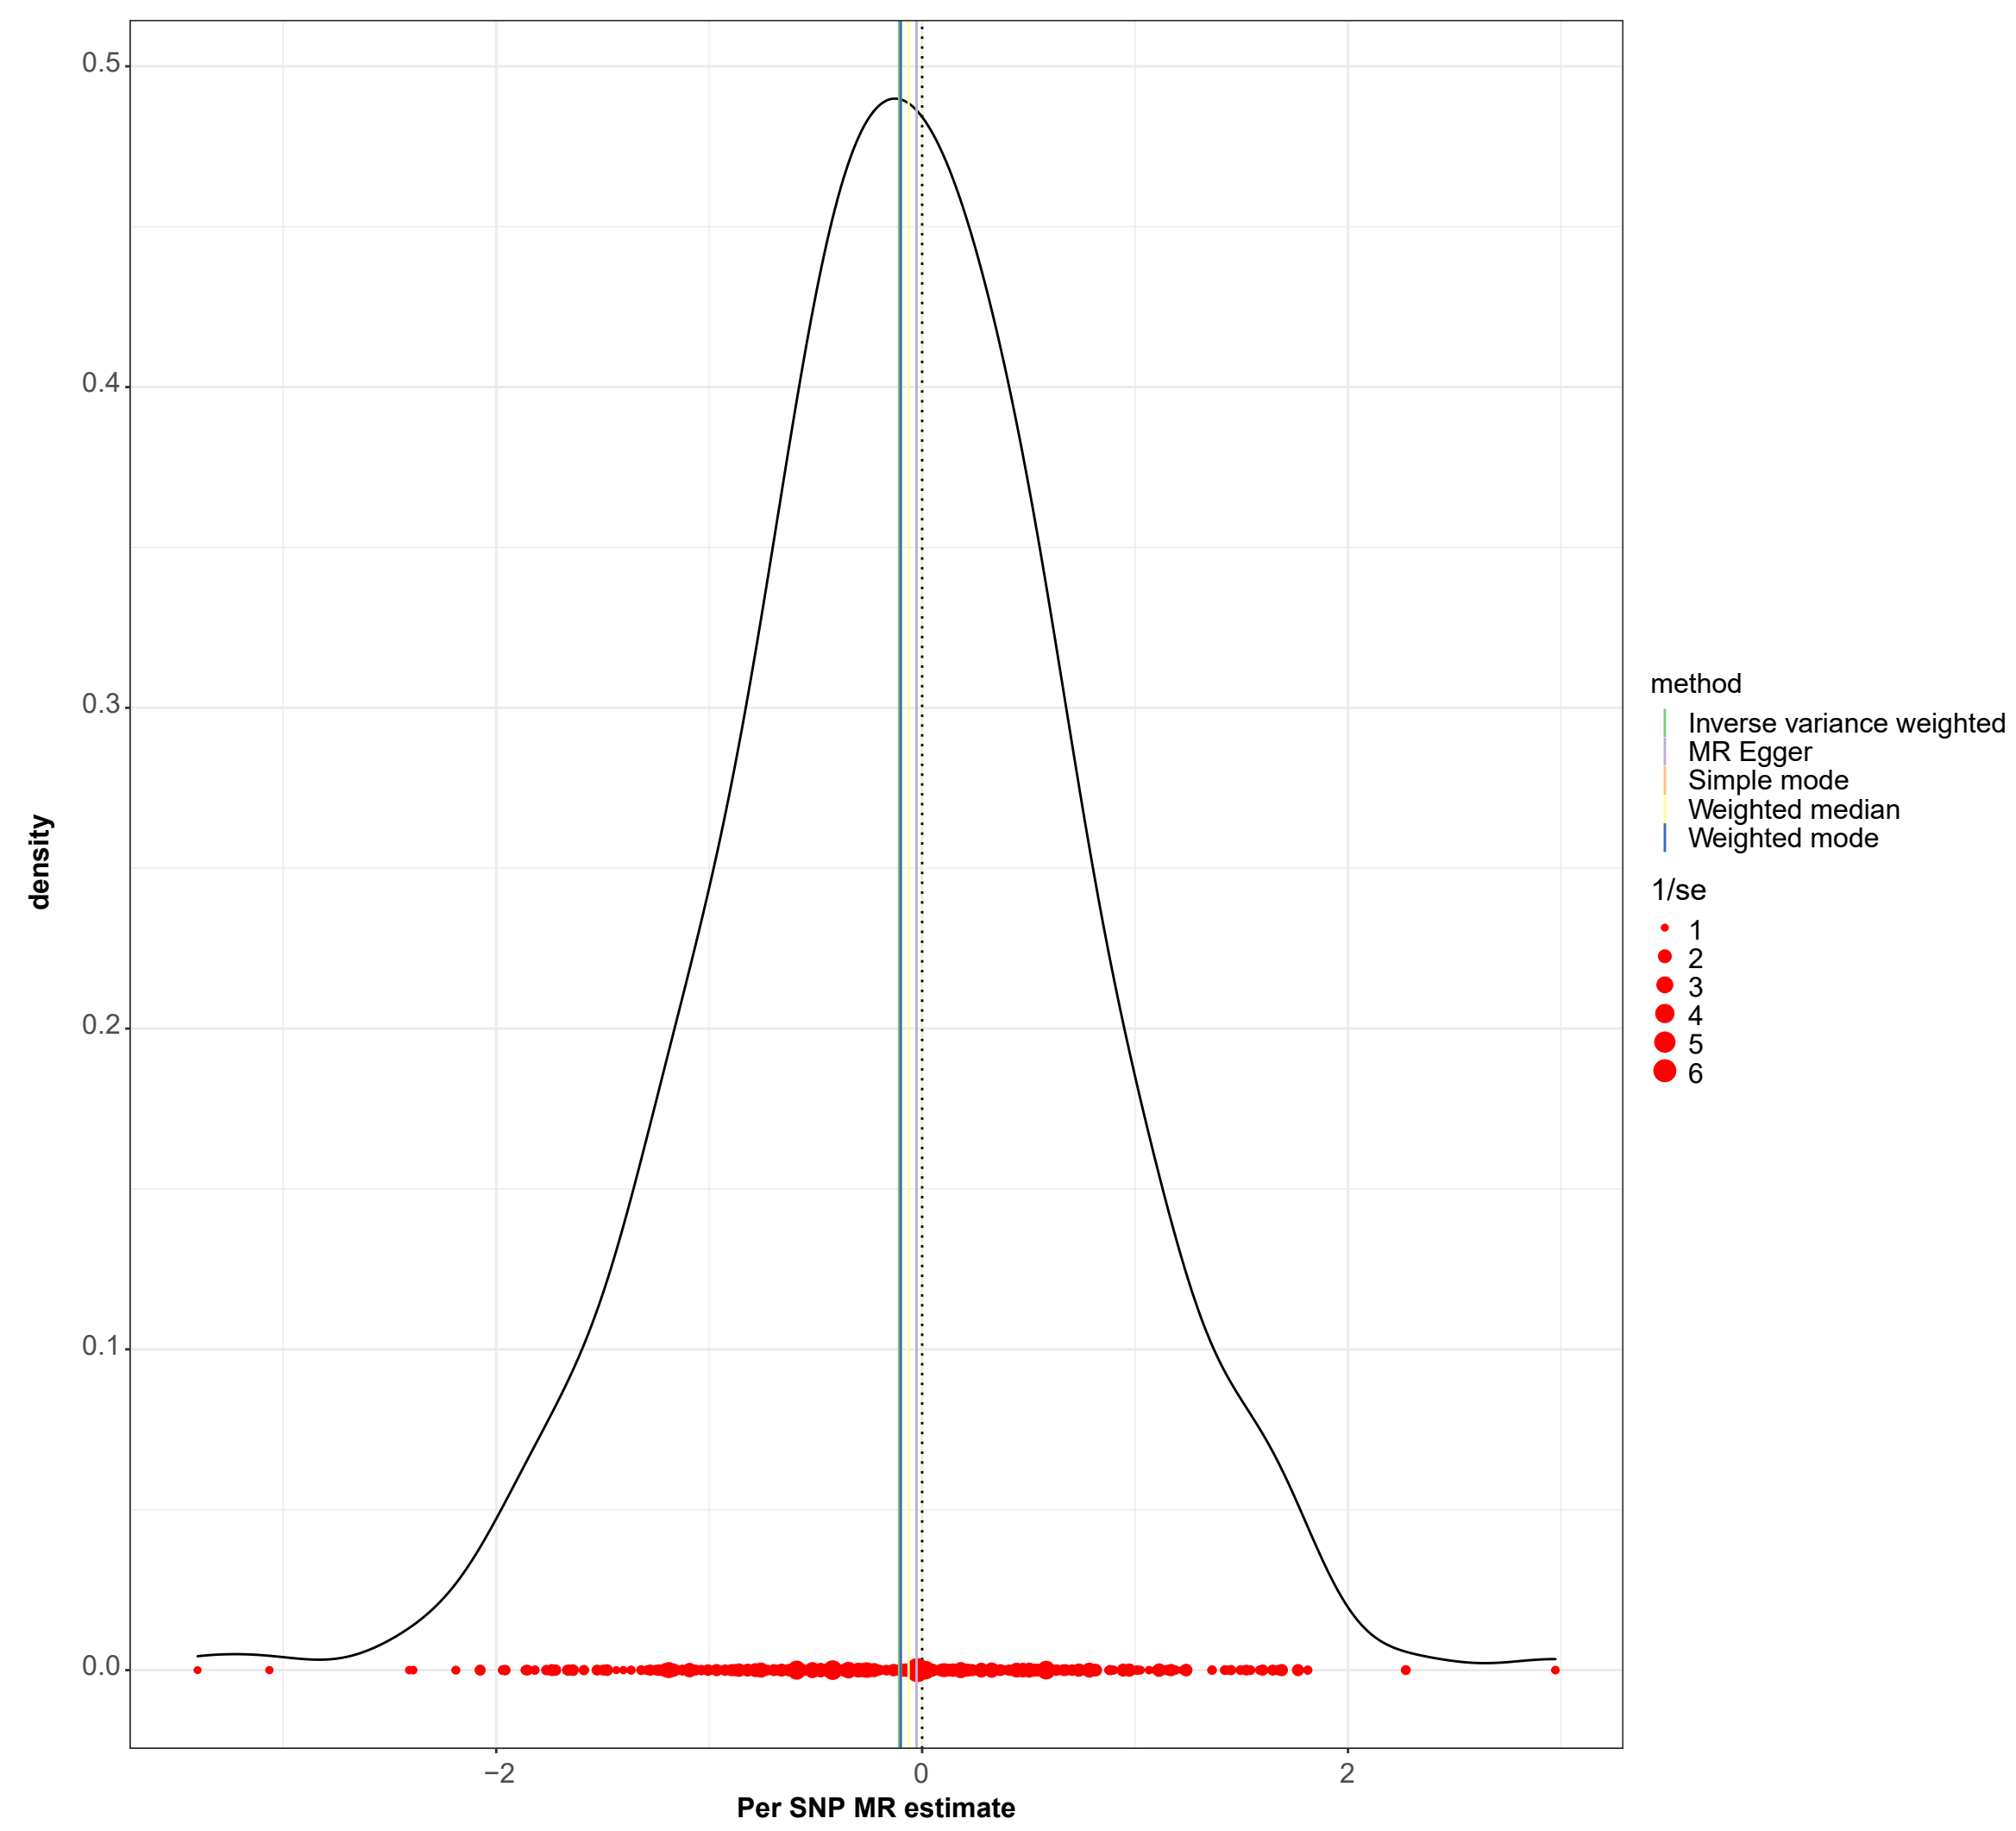

D

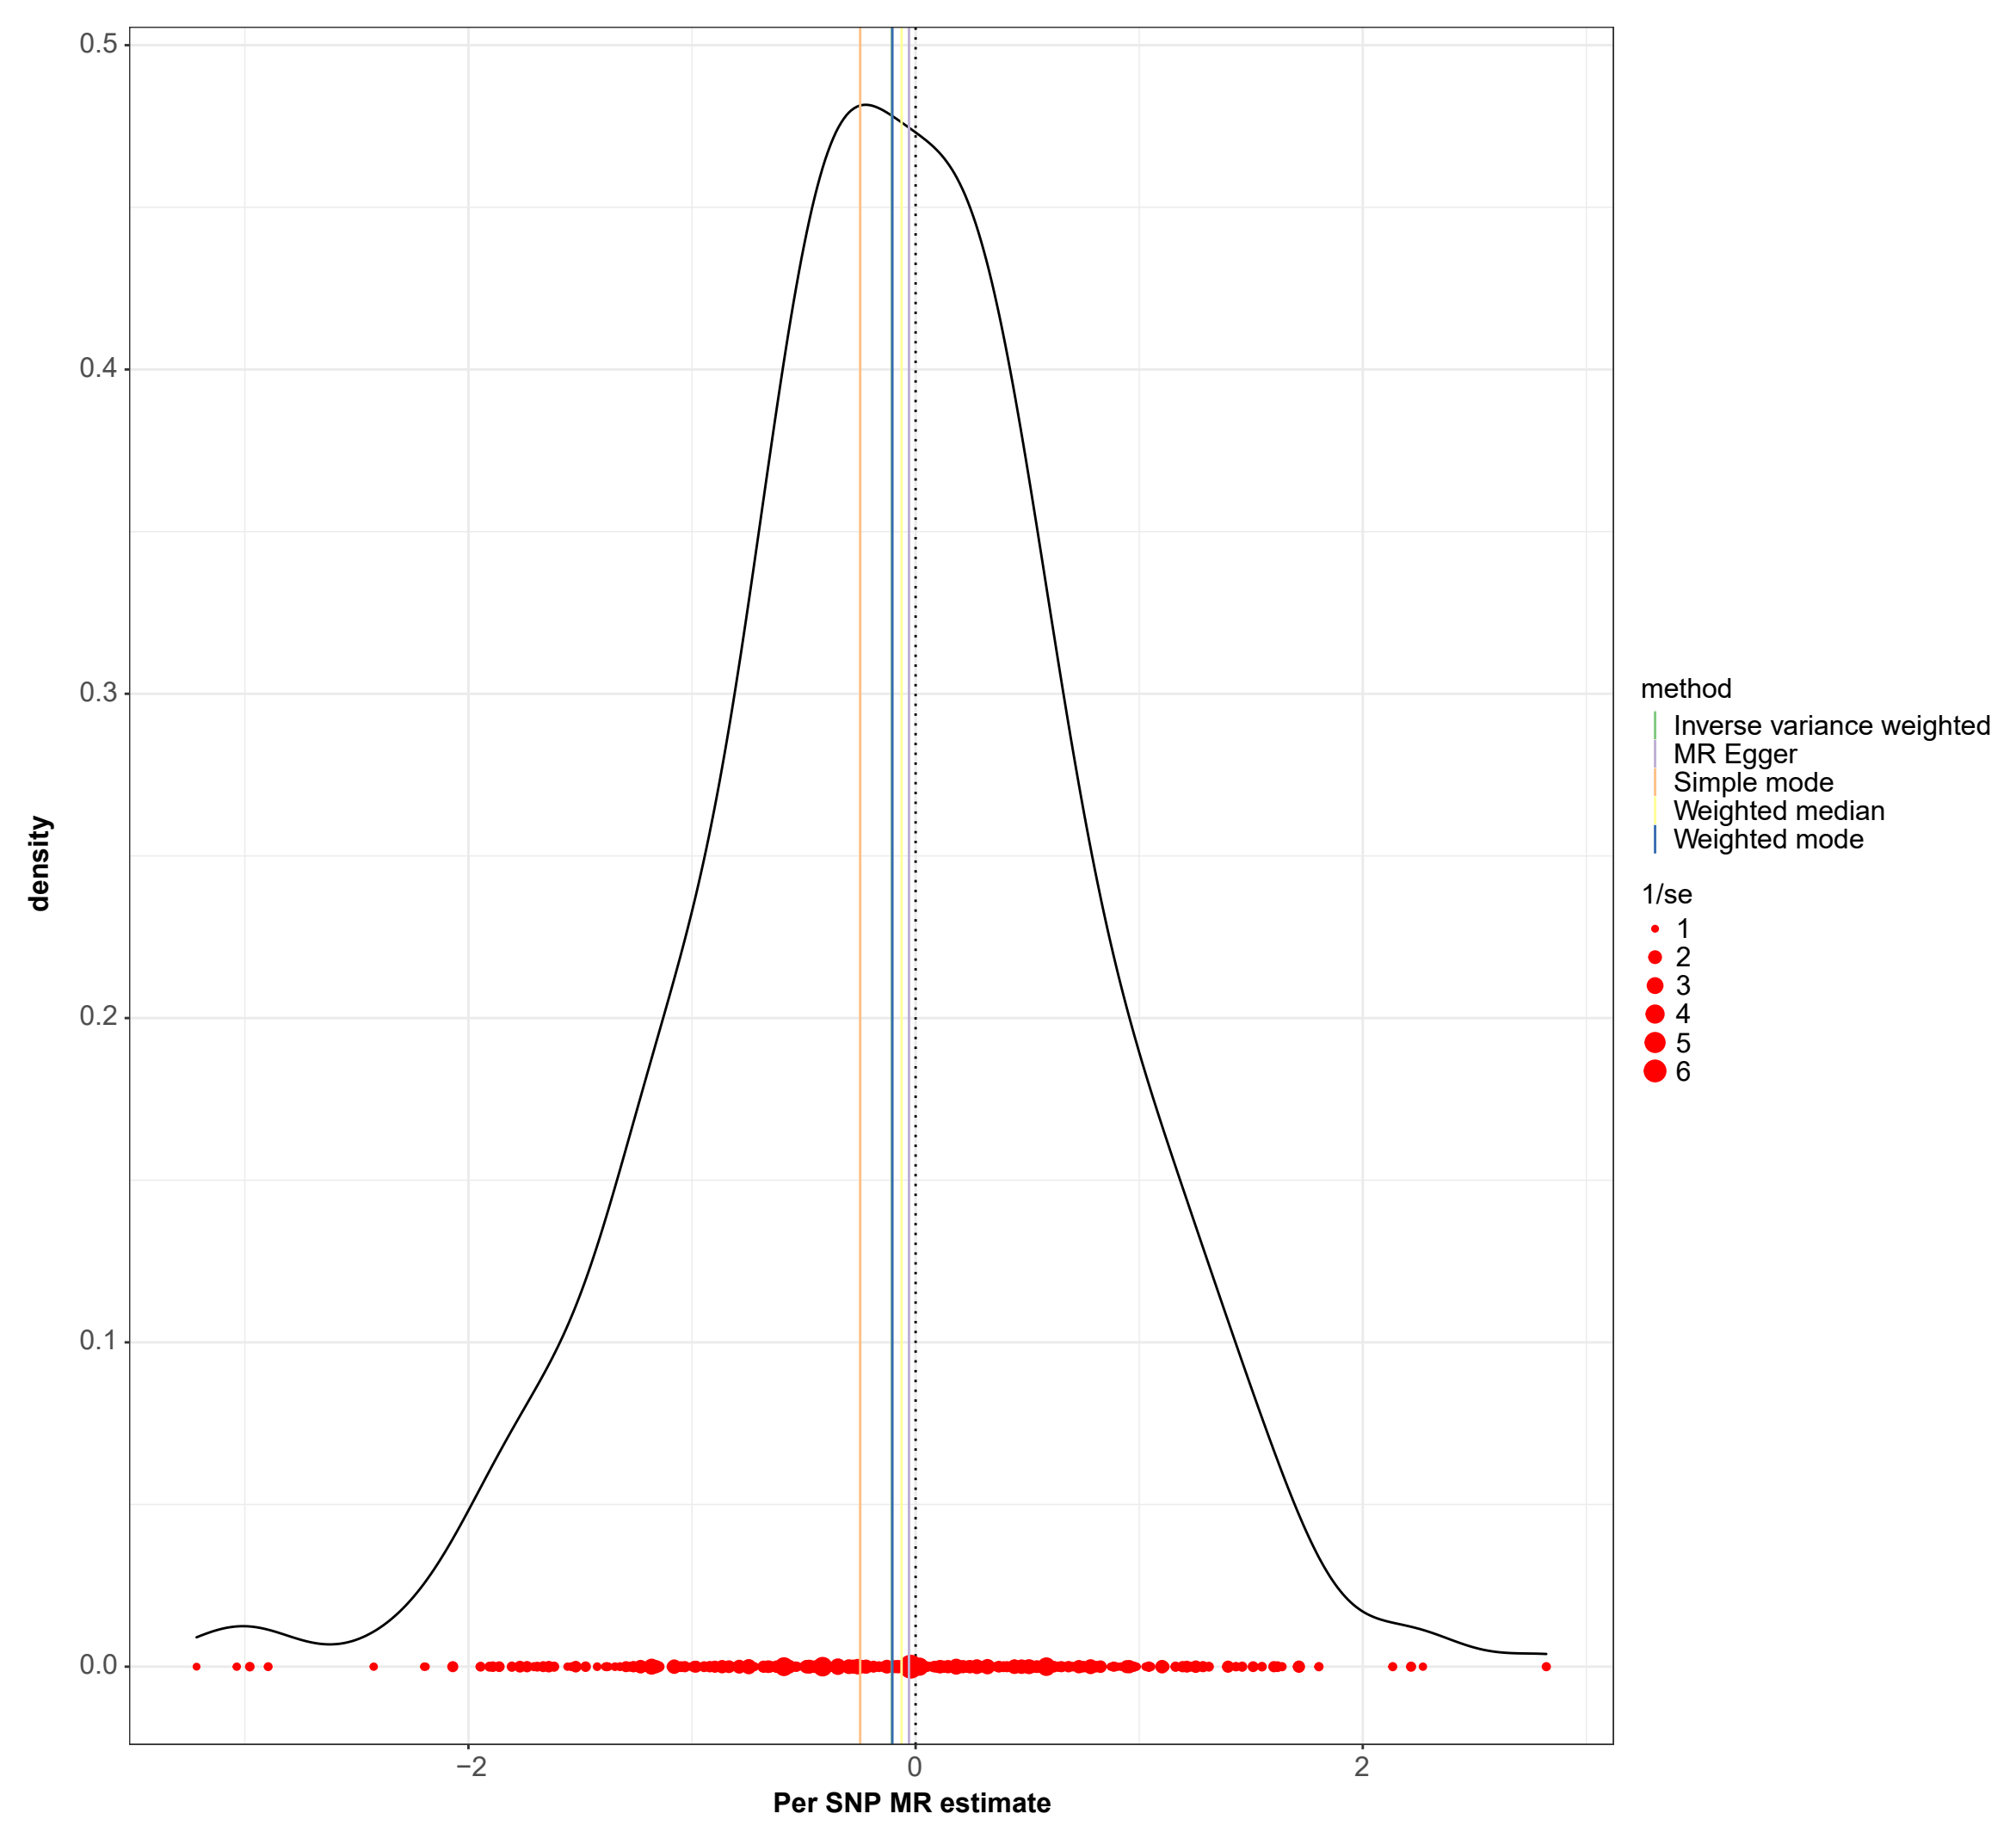

Supplement: Figure_S1.pdf [file Figure_S1.pdf]
