# Supplementary material for: Body mass index and the risk of basal cell carcinoma: evidence from Mendelian randomization analysis
Source: PeerJ journal article supplement (doi:10.7717/peerj.14781), 2023-01-24
Supplement: Figure_S3.pdf [file Figure_S3.pdf]

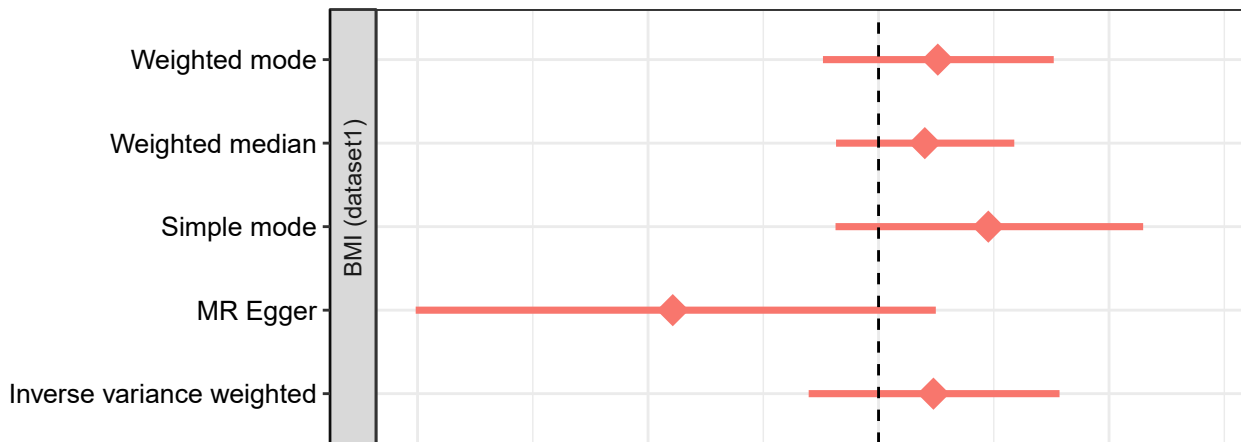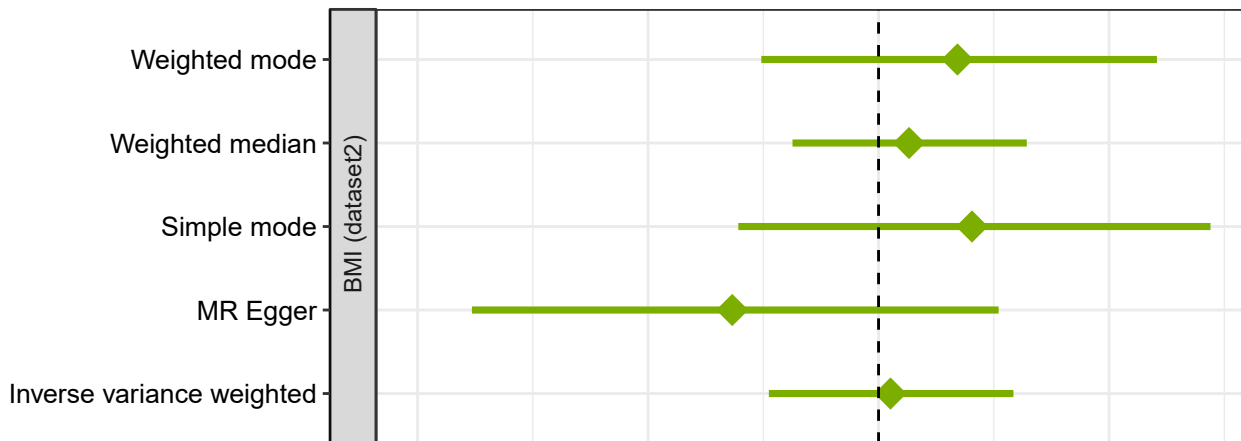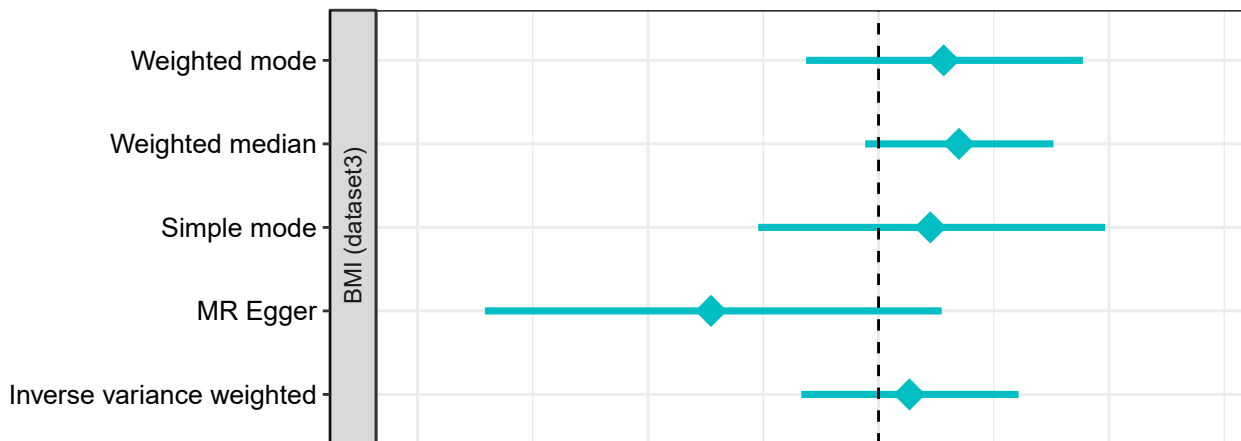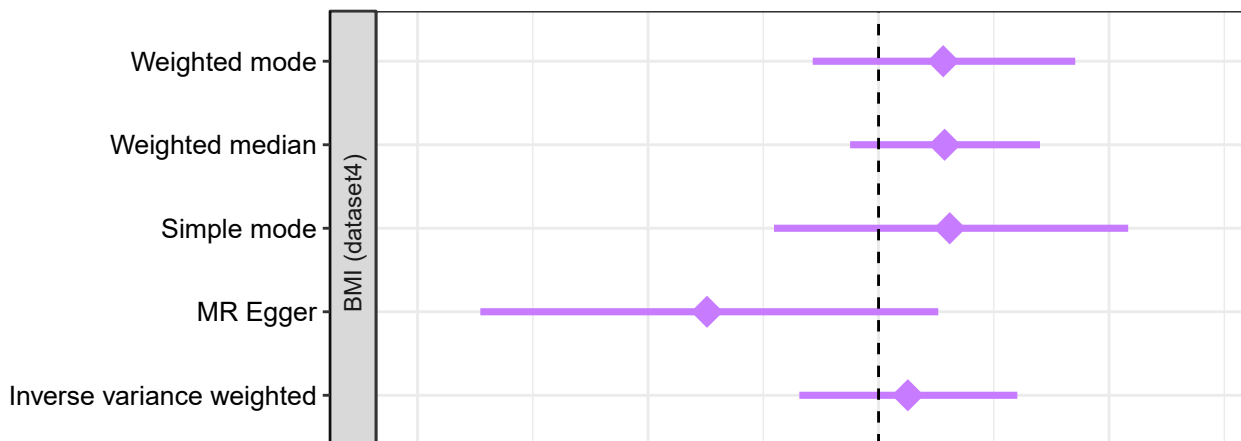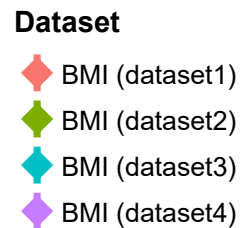

OR (95%CI)
